# Supplementary material for: An on-site inspection system for explosives in a container using dust collection through a vent cover and ion mobility spectrometric detection
Source: Royal Society of Chemistry journal article supplement (doi:10.1039/d4ay01093k), 2024-01-01
Supplement: d4ay01093k1.pdf [file d4ay01093k1.pdf]

1 **On-site inspection system for explosives in a container using dust collection**

2 **through a vent cover and ion mobility spectrometric detection**

3

4

5 **Supplementary Material**

6

7

8

9

10 **Table S1** Collection weights of the model dust through the vent cover ( $W_{col}$ ,  $\mu\text{g}$ ).

| Model dust         | Sample position |         |          |
|--------------------|-----------------|---------|----------|
|                    | A               | B       | C        |
| Cotton fabric (CF) | 801±51          | 1134±60 | 1899±90  |
| Sawdust (SD)       | 930±120         | 1431±81 | 2100±150 |
| Clay (CL)          | 69±30           | 300±99  | 531±60   |
| Silica (SL)        | 570±30          | 630±30  | 831±30   |

11

12

13

**Cotton fabric (CF)**

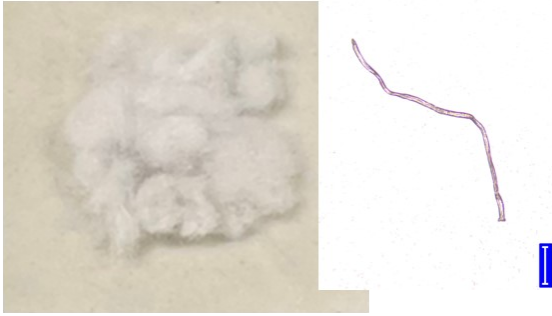

**Sawdust (SD)**

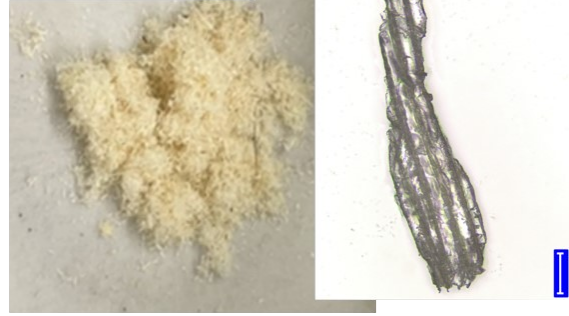

**Clay (CL)**

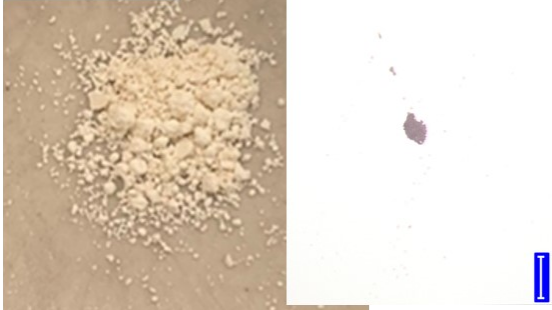

**Silica (SL)**

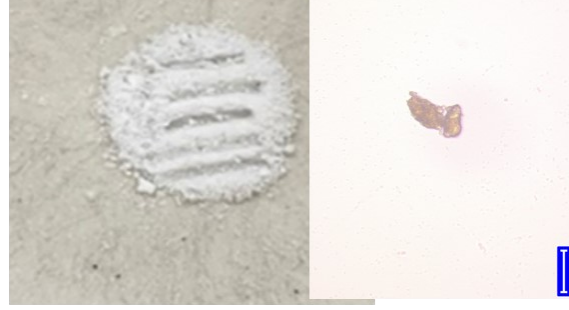

16 **Fig. S1** Photos and magnified images ( $\times 100$ ) of the single particles. The scale bars are 100  $\mu\text{m}$ .

20

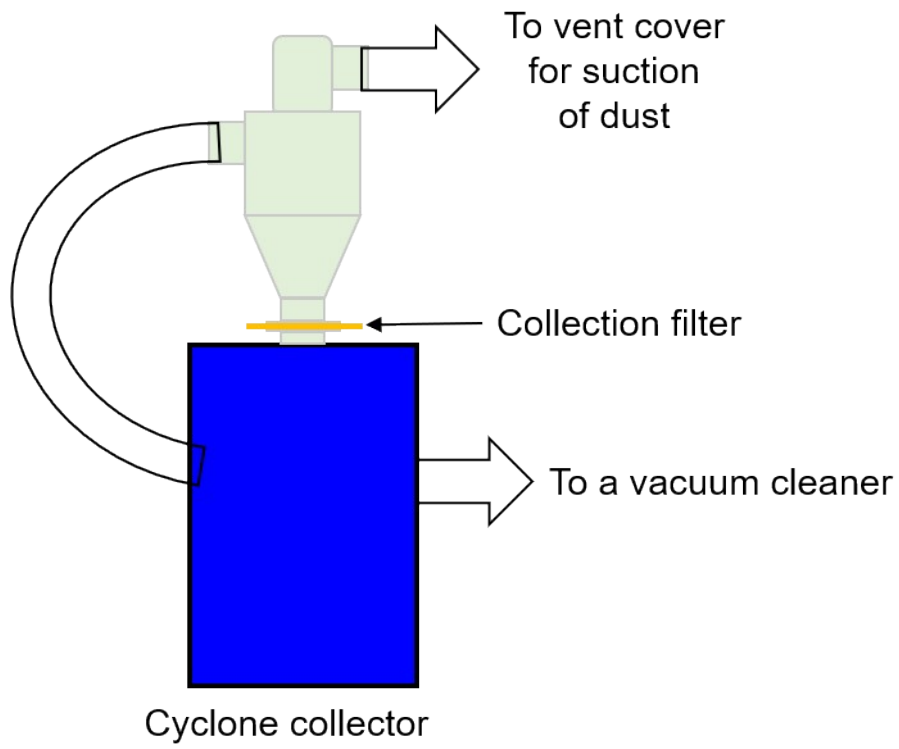

21

22 **Fig. S2** Schematic diagram of apparatus for suction of dust in a vent cover using a cyclone  
23 collector and a vacuum cleaner.

24

25

26

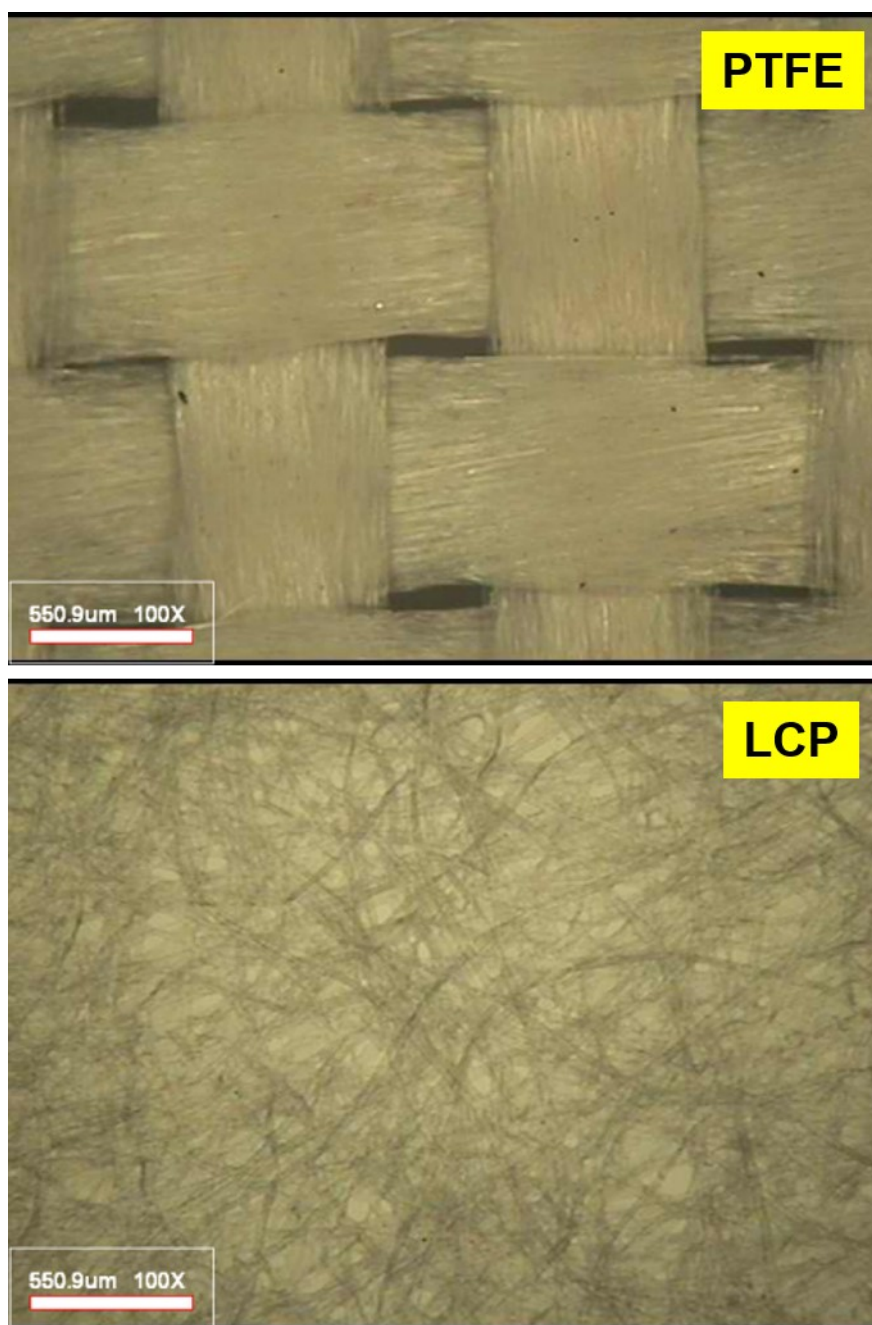

29 **Fig. S3** Magnified images of the PTFE and LCP collection filters. The scale bars are 550.9  $\mu\text{m}$ .

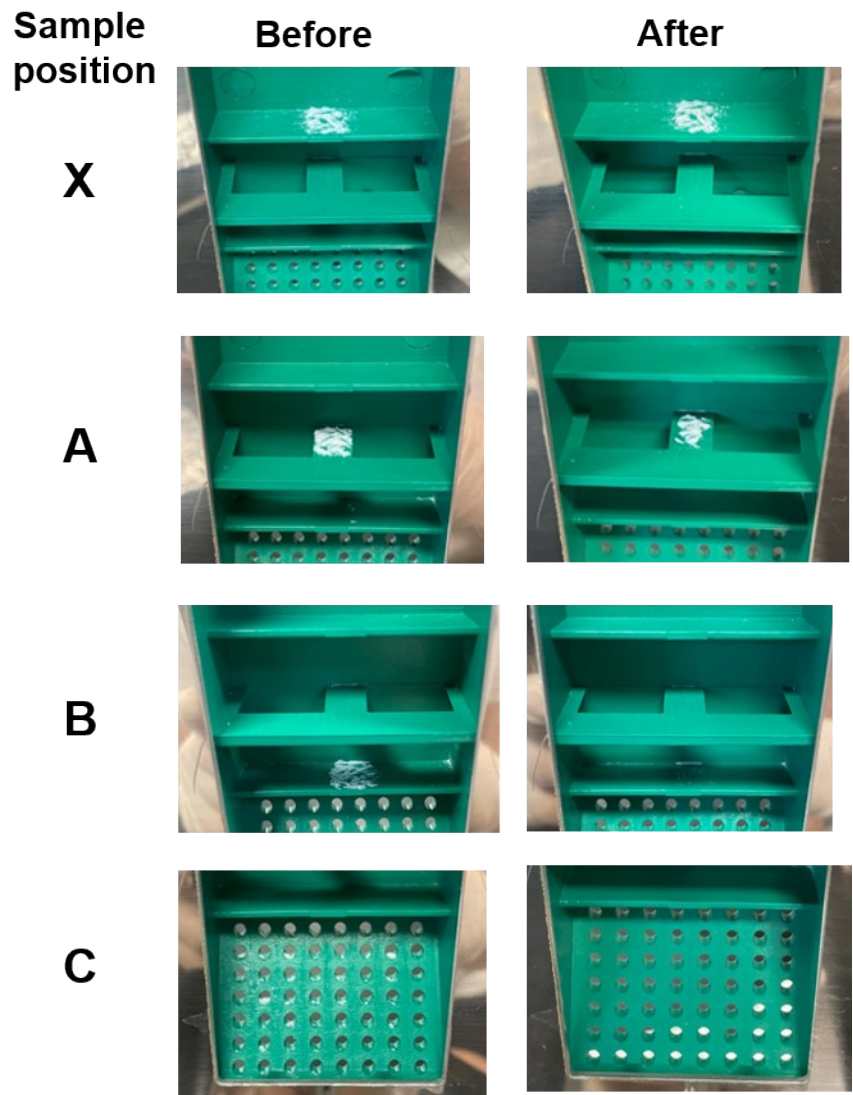

35 **Fig. S4** Photos of the insides of the vent cover before and after suction of dust.

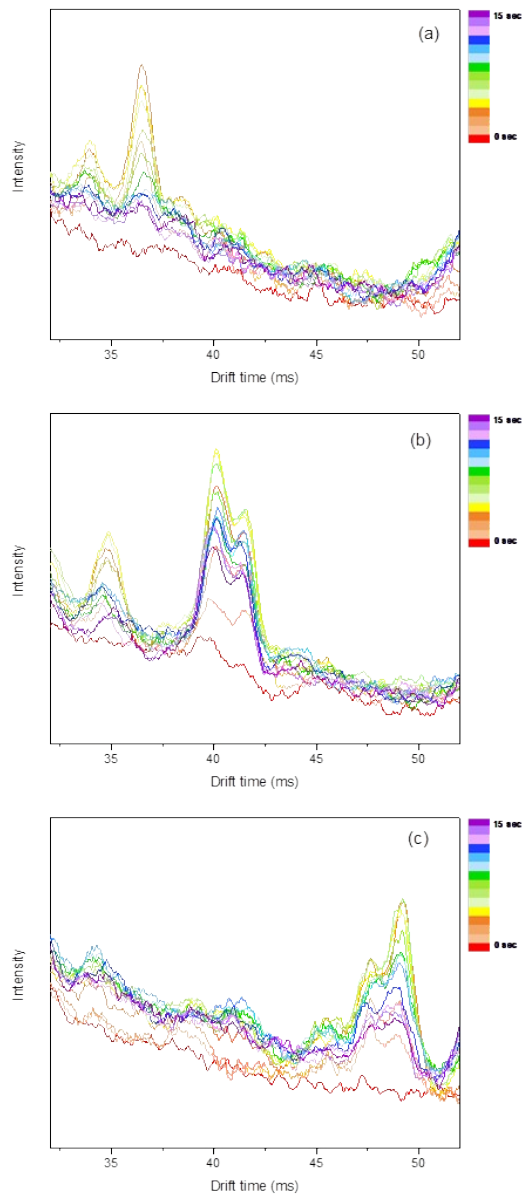

40

41 **Fig. S5** IMS spectra of TNT (a), RDX (b), and PETN (c) at the minimum concentrations of  
42 explosives adsorbed in the model dusts ( $C_{\min}$ ). LCP and CF were used as the collection filter  
43 and dust, respectively. The samples were collected at the Position-C.

44

45

46

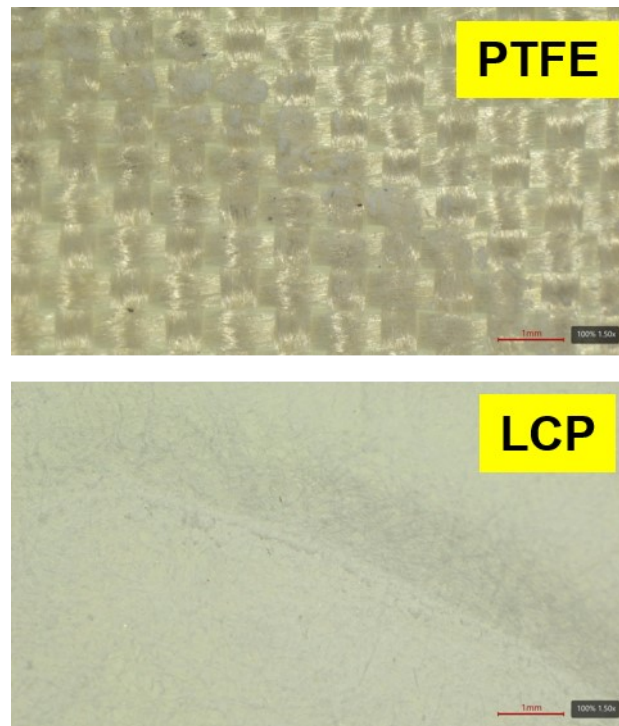

47

48 **Fig. S6** Magnified images of the PTFE and LCP collection filters after collection of the CL  
49 dust. The scale bars are 1 mm.

50

51

52



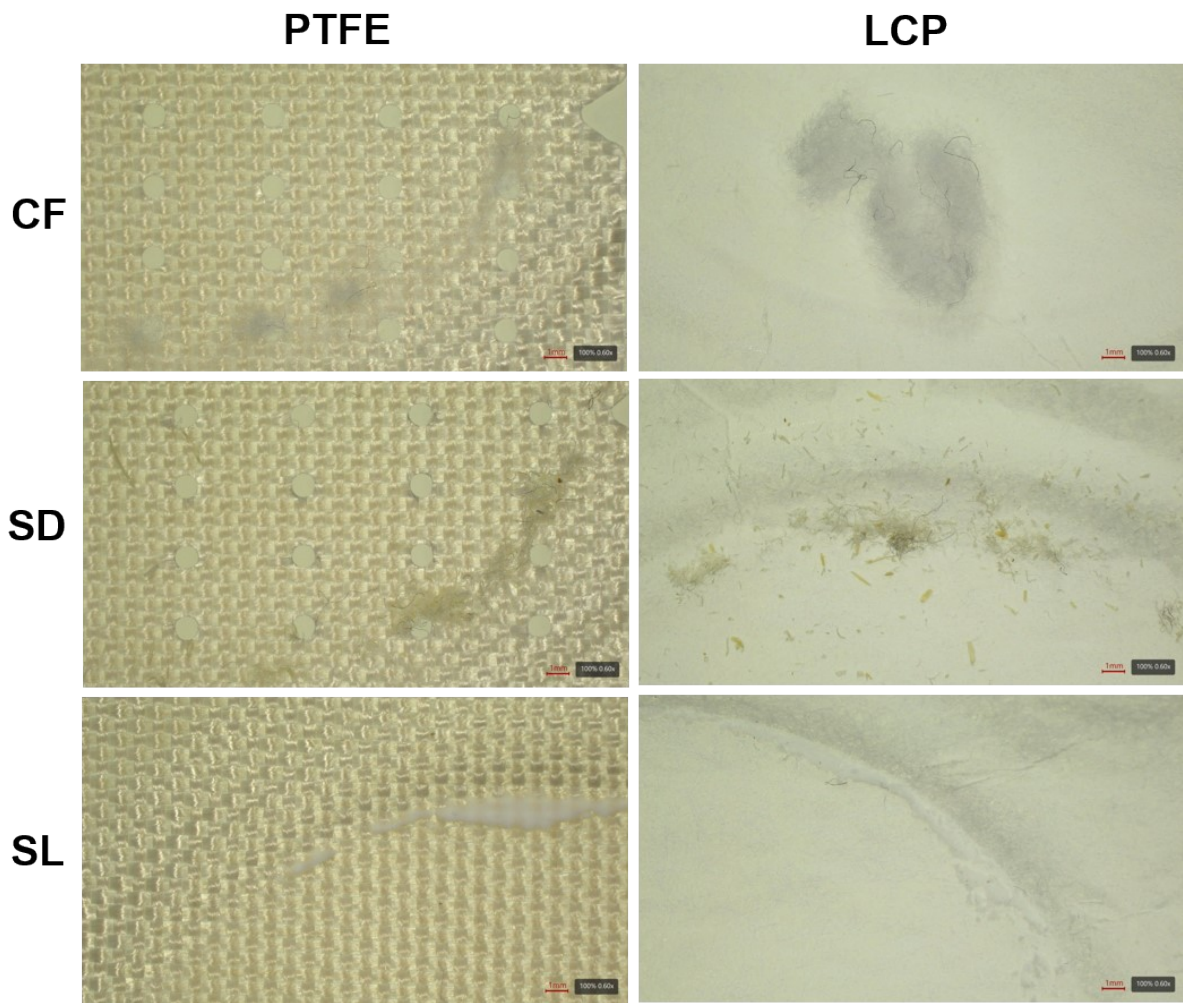

54

55 **Fig. S7** Magnified images of the PTFE and LCP collection filters after collection of the CF,  
56 SD, and SL dust. The scale bars are 1 mm.

57

58
